1 **SARS-CoV-2 infection, disease and transmission in domestic cats**

2

3 Natasha N. Gaudreault<sup>1</sup>, Jessie D. Trujillo<sup>1</sup>, Mariano Carossino<sup>2</sup>, David A. Meekins<sup>1</sup>, Igor  
4 Morozov<sup>1</sup>, Daniel W. Madden<sup>1</sup>, Sabarish V. Indran<sup>1</sup>, Dashzeveg Bold<sup>1</sup>, Velmurugan Balaraman<sup>1</sup>,  
5 Taeyong Kwon<sup>1</sup>, Bianca Libanori Artiaga<sup>1</sup>, Konner Cool<sup>1</sup>, Adolfo García-Sastre<sup>3,4,5,6</sup>, Wenjun  
6 Ma<sup>1,†</sup>, William C. Wilson<sup>7</sup>, Jamie Henningson<sup>1</sup>, Udeni B. R. Balasuriya<sup>2</sup>, Juergen A. Richt<sup>1\*</sup>

7

8 <sup>1</sup>Department of Diagnostic Medicine/Pathobiology, College of Veterinary Medicine, Kansas  
9 State University, Manhattan, KS, USA

10 <sup>2</sup>Louisiana Animal Disease Diagnostic Laboratory and Department of Pathobiological Sciences,  
11 School of Veterinary Medicine, Louisiana State University, Baton Rouge, LA

12 <sup>3</sup>Department of Microbiology, Icahn School of Medicine at Mount Sinai, New York, NY, USA

13 <sup>4</sup>Global Health and Emerging Pathogens Institute, Icahn School of Medicine at Mount Sinai,  
14 New York, NY, USA

15 <sup>5</sup>Department of Medicine, Division of Infectious Diseases, Icahn School of Medicine at Mount  
16 Sinai, New York, NY, USA

17 <sup>6</sup>The Tisch Cancer Institute, Icahn School of Medicine at Mount Sinai, New York, NY, USA

18 <sup>7</sup>Arthropod Borne Animal Disease Research Unit, Agricultural Research Service, United States  
19 Department of Agriculture, Manhattan, KS, USA

20 <sup>†</sup>Present Address: Department of Veterinary Pathobiology and Department of Molecular  
21 Microbiology and Immunology, University of Missouri, Columbia, MO, USA

22

23 \*Corresponding author:

24 Dr. Juergen A. Richt; Department of Diagnostic Medicine/Pathobiology, College of Veterinary  
25 Medicine, Kansas State University, Manhattan, KS, USA; E-mail: [jricht@ksu.edu](mailto:jricht@ksu.edu)

26

27 Running title: SARS-CoV-2 in domestic cats

28 Keywords: SARS-CoV-2; COVID-19; felines; cats; pets; transmission

29

30 Abstract: 258 words, Text: 6,504 words, Figures: 5 and Tables: 3

31 **Abstract**

32 Severe Acute Respiratory Syndrome Coronavirus 2 (SARS-CoV-2) is the cause of Coronavirus  
33 Disease 2019 (COVID-19) and responsible for the current pandemic. Recent SARS-CoV-2  
34 susceptibility and transmission studies in cats show that the virus can replicate in these companion  
35 animals and transmit to other cats. Here, we present an in-depth study of SARS-CoV-2 infection,  
36 associated disease and transmission dynamics in domestic cats. Six 4- to 5-month-old cats were  
37 challenged with SARS-CoV-2 via intranasal and oral routes simultaneously. One day post  
38 challenge (DPC), two sentinel contact cats were co-mingled with the principal infected animals.  
39 Animals were monitored for clinical signs, clinicopathological abnormalities and viral shedding  
40 throughout the 21 DPC observation period. *Postmortem* examinations were performed at 4, 7 and  
41 21 DPC to investigate disease progression. Viral RNA was not detected in blood but transiently  
42 in nasal, oropharyngeal and rectal swabs and bronchoalveolar lavage fluid as well as various  
43 tissues. Tracheobronchoadenitis of submucosal glands with the presence of viral RNA and antigen  
44 was observed in airways of the infected cats on 4 and 7 DPC. Serology showed that both, principal  
45 and sentinel cats, developed SARS-CoV-2-specific and neutralizing antibodies to SARS-CoV-2  
46 detectable at 7 DPC or 10 DPC, respectively. All animals were clinically asymptomatic during  
47 the course of the study and capable of transmitting SARS-CoV-2 to sentinels within 2 days of  
48 comingling. The results of this study are critical for our understanding of the clinical course of  
49 SARS-CoV-2 in a naturally susceptible host species, and for risk assessment of the maintenance  
50 of SARS-CoV-2 in felines and transmission to other animals and humans.

51

## 52 1. Introduction

53 Coronaviruses are enveloped single-stranded, positive-sense RNA viruses that belong to the  
54 order *Nidovirales* in the family *Coronaviridae*, subfamily *Orthocoronavirinae*, and are comprised  
55 of four genera: *Alphacoronavirus*, *Betacoronavirus*, *Gammacoronavirus*, and *Deltacoronavirus*  
56 (Fehr and Perlman 2015). Many alpha- and betacoronaviruses originate from bats, while gamma-  
57 and deltacoronaviruses originate in birds (Woo, Lau et al. 2012). The Severe Acute Respiratory  
58 Syndrome-related Coronaviruses (SARS-CoV and SARS-CoV-2), and the Middle East  
59 Respiratory Syndrome coronavirus (MERS-CoV) belong to the genus betacoronavirus  
60 (Gorbalenya, Baker et al. 2020; Fung and Liu 2019). Alpha- and betacoronaviruses infect only  
61 mammals and cause important diseases of humans, cattle, pigs, cats, dogs, horses, and camels  
62 (Saif, 2004; Woo, Lau et al. 2012; Fehr and Perlman 2015). In general, coronaviruses cause  
63 respiratory, enteric, and systemic infections in humans and numerous animal hosts (Saif, 2004,  
64 Fehr and Perlman 2015). Importantly, coronaviruses can occasionally cross the species barriers  
65 (Drexler, Corman et al. 2014; Corman, Muth et al. 2018).

66 Bats have been identified as a reservoir species for many coronaviruses including those  
67 causing important human epidemics, namely SARS-CoV in 2002-2003 and MERS-CoV in 2012  
68 (Drexler, Corman et al. 2014). Camels have since been shown to serve as the primary intermediate  
69 and reservoir host for MERS-CoV, causing continued zoonotic animal-to-human transmissions  
70 (de Wit, Doremalen et al. 2016). During the SARS-CoV epidemic, infected domestic cats were  
71 identified from households of SARS-CoV positive patients, and both cats and ferrets were  
72 subsequently experimentally shown to be easily infected and transmit SARS-CoV (Martina,  
73 Haagmans et al. 2003; van den Brand, Haagmans et al. 2008).

74 SARS-CoV-2 is the cause of Coronavirus Disease 2019 (COVID-19) and responsible for the  
75 current global pandemic (Zhou, Yang et al. 2020). A zoonotic transmission event amplified at a  
76 seafood and animal market in Wuhan, Hubei Province, China, is suspected to be the site of the  
77 first significant infectious outbreak in humans (Li, Guan et al. 2020), with bats and/or pangolins  
78 being speculated as the potential origin species based on the sequence homology of coronaviruses  
79 isolated from these animals (Anderson, Rambaut et al. 2020; Zhang, Wu et al. 2020; Zhou, Yang  
80 et al. 2020).

81 Since the outbreak of SARS-CoV-2 was first identified in December of 2019, it has been  
82 demonstrated that SARS-CoV-2 can naturally and experimentally infect several animal species  
83 (Lakdawala and Menachery 2020; Hernandez, Abad et al. 2020; Oreshkova et al. 2020). There  
84 have been multiple case reports of natural transmission of the virus from humans to dogs and cats,  
85 infection of “big cats” (i.e. a lion and tigers) at the Bronx Zoo, and mink on farms in The  
86 Netherlands, Denmark and Spain (Newman, Smith et al. 2020; Leroy, Gouilh et al. 2020;  
87 Oreshkova et al., 2020). In a recent animal susceptibility study, dogs, cats, ferrets, pigs, chickens  
88 and ducks were experimentally infected with SARS-CoV-2 (Shi, Wen et al. 2020). The results  
89 from that study show that both cats and ferrets were efficiently infected and could transmit the  
90 virus, dogs showed low susceptibility, while pigs and avian species were not permissive hosts. In  
91 addition, non-human primates (NHPs), hamsters and hACE2 transgenic or adenovirus transduced  
92 mice have also been evaluated as potential animal models for SARS-CoV-2 and seem to be  
93 susceptible showing mild to severe clinical signs (Cleary, Pitchford et al. 2020; Lakdawala and  
94 Menachery 2020).

95 The close association between humans and animals including companion animals, livestock  
96 and wildlife species, raises concerns regarding the potential risks of transmission of SARS-CoV-

97 2 from humans to animals (“reverse zoonosis”), and the potential role infected animals could play  
98 in perpetuating the spread of the disease (Hernandez, Abad et al. 2020; Leroy, Gouilh et al. 2020).  
99 Further research of SARS-CoV-2 infection in various animal species is needed in order to identify  
100 susceptible hosts and to better understand the infection, disease, clinical course and transmission  
101 capabilities of susceptible animal species. This knowledge is important for risk assessment,  
102 implementing mitigation strategies, addressing animal welfare issues, and to develop preclinical  
103 animal models for evaluating drug and vaccine candidates for COVID-19.

104 Here we present an in-depth study of SARS-CoV-2 infection, associated disease and  
105 transmission in domestic cats. Clinical evaluation of weight, body temperature, blood parameters,  
106 serology, viral RNA shedding and RNA distribution in tissues and organ systems, and associated  
107 pathological findings are presented and discussed.

108

## 109 **2. Material and methods**

### 110 *2.1. Cells and Virus*

111 Vero E6 cells (ATCC<sup>®</sup> CRL-1586<sup>™</sup>, American Type Culture Collection, Manassas, VA,  
112 USA) were used for virus propagation and titration. Cells were cultured in Dulbecco’s Modified  
113 Eagle’s Medium (DMEM, Corning, New York, N.Y, USA), supplemented with 5% fetal bovine  
114 serum (FBS, R&D Systems, Minneapolis, MN, USA) and antibiotics/antimycotics (Fisher  
115 Scientific, Waltham, MA, USA), and maintained at 37 °C under a 5% CO<sub>2</sub> atmosphere. The SARS-  
116 CoV-2 USA-WA1/2020 strain was acquired from Biodefense and Emerging Infection Research  
117 Resources Repository (catalogue # NR-52281, BEI Resources, Manassas, VA, USA) and passaged  
118 3 times in Vero E6 cells to establish a stock virus for inoculation of animals. This stock virus was

119 sequenced by next generation sequencing (NGS) using the Illumina MiSeq and its consensus  
120 sequence was found to be 100% homologous to the original USA-WA1/2020 strain (GenBank  
121 accession: MN985325.1). To determine infectious virus titer, 10-fold serial dilutions were  
122 performed on 96-well plates of Vero E6 cells. The presence of cytopathic effect (CPE) after 96  
123 hours incubation was used to calculate the 50% tissue culture infective dose (TCID<sub>50</sub>)/ml using the  
124 Spearman-Karber method (Hierholzer and Killington 1996). The prepared SARS-CoV-2 stock  
125 has a titer of 1 x 10<sup>6</sup> TCID<sub>50</sub>/ml; this virus stock was used for experimental infection of the cats.

126

## 127 *2.2. Animals and experimental design*

### 128 *2.2.1. Ethics statement for use of animals*

129 All animal studies and experiments were approved and performed under the Kansas State  
130 University (KSU) Institutional Biosafety Committee (IBC, Protocol #1460) and the Institutional  
131 Animal Care and Use Committee (IACUC, Protocol #4390) in compliance with the Animal  
132 Welfare Act. All animal and laboratory work were performed in biosafety level-3+ and -3Ag  
133 laboratory and facilities in the Biosecurity Research Institute at KSU in Manhattan, KS, USA.

### 134 *2.2.2. Virus challenge of animals*

135 Ten 4.5- to 5-month old intact male cats were acclimated for seven days to BSL-3Ag  
136 biocontainment prior to experimental procedures with feed and water *ad libitum*. These were  
137 antibody profile defined/specific pathogen free (APD/SPF) animals with no detectable antibody  
138 titers to feline herpesvirus (rhinotracheitis), feline calicivirus, feline panleukopenia virus, feline  
139 coronaviruses, feline immunodeficiency virus, *Chlamydia felis* and *Toxoplasma gondii* obtained  
140 from Marshall BioResources (North Rose, New York, USA). The cats were placed into three

141 groups (**Figure 1, and Table 1**). Group 1 (principal infected animals) consisted of six cats (three  
142 cats per housing unit), were inoculated simultaneously via the intranasal and oral routes with a  
143 total dose of  $1 \times 10^6$  TCID<sub>50</sub> of SARS-CoV-2 in a total of 2 ml DMEM medium (0.5 ml per nostril  
144 and 1 ml oral). The cats in Group 2 (n=2; sentinel contact animals) and Group 3 (n=2; mock  
145 control animals) were housed in a separate room (**Table 1, and Figure 1**). Mock-infected cats  
146 (Group 3) were administered 2 ml DMEM via the intranasal and oral routes similar to Group 1  
147 animals. At 1-day post challenge (DPC), the two cats in Group 2 were co-mingled with the  
148 principal infected animals in Group 1 (one cat per housing unit), and served as sentinel contact  
149 controls. The remaining two cats in Group 3 remained housed in a separate room and served as  
150 mock-infected negative controls. Principal infected animals were euthanized for *postmortem*  
151 examinations at 4 (n=2), 7 (n=2) and 21 (n=1) DPC to evaluate the course of disease. The two  
152 negative control animals in Group 3 were euthanized for *postmortem* examinations at 3 DPC. The  
153 remaining three animals from Group 1 (one principal infected animal) and Group 2 (two sentinel  
154 contact animals) were maintained for future re-infection studies, and not terminated as part of this  
155 study.

### 156 2.2.3. *Clinical evaluations and sample collection*

157 Cats were observed daily for clinical signs, such as: fever, anorexia, lethargy, respiratory  
158 distress, inappetence, depression, recumbency, coughing, sneezing, diarrhea/loose stool, vomiting  
159 and others. Weights of all cats were recorded on bleed days. Blood and serum were collected  
160 from all cats, including sentinel contact controls, on -1 DPC prior to infection, and on days 1, 3, 5,  
161 7, 10, 14 and 21 DPC via venipuncture of the cephalic vein under anesthesia or during terminal  
162 bleeding by cardiac puncture. Nasal, oropharyngeal and rectal swabs were also collected on -1, 1,  
163 3, 5, 7, 10, 14 and 21 DPC in 2 ml of virus transport medium (VTM; DMEM; Corning, New York,

164 N.Y, USA) with antibiotics/antimycotic (Fisher Scientific, Waltham, MA, USA). Swabs were  
165 vortexed and supernatant aliquoted directly into cryovials or into RLT buffer (Qiagen,  
166 Germantown, MD, USA) and stored at -80 °C until further analysis.

167       A full *postmortem* examination was performed for each cat at the indicated time-points and  
168 gross changes (if any) were recorded. Tissues were collected either in 10% neutral-buffered  
169 formalin (Fisher Scientific, Waltham, MA, USA), or as fresh tissues which were then frozen at -  
170 80°C. A *postmortem* examination protocol was developed to collect the upper and lower  
171 respiratory tract, central nervous system (brain and cerebral spinal fluid [CSF] (**Figure S2**),  
172 gastrointestinal (GI) tract as well as accessory organs. The lungs were removed *in toto* including  
173 the trachea, and the main bronchi were collected at the level of the bifurcation and at the entry  
174 point into the lung lobe (**Figure S2B**). Lung lobes were evaluated based on gross pathology and  
175 collected and sampled separately (**Figure S2C**). Bronchoalveolar lavage fluid (BALF), nasal wash  
176 and urine were also collected during *postmortem* examination and stored at -80°C until analyzed.  
177 Fresh frozen tissue homogenates were prepared by thawing frozen tissue and placing 200 mg ( $\pm$   
178 50 mg) of minced tissue in a tube containing 1 ml DMEM culture medium and a steel bead  
179 (Qiagen, Germantown, MD, USA). Homogenization was performed with the TissueLyser LT  
180 (Qiagen, Germantown, MD, USA) for 30 seconds at 30 hertz repeated 3 times. Supernatant was  
181 retained after centrifugation for RNA extraction and quantitative reverse transcription real-time  
182 PCR (RT-qPCR).

### 183       2.3.       *Blood cell counts*

184       Complete blood cell counts were performed using fresh EDTA blood samples run on an  
185 automated VetScan HM5 Hematology Analyzer (Abaxis, Inc., Union City, CA) according to the  
186 manufacturer's recommended protocol using the VetScan HM5 reagent pack and recommended



187 calibration controls. Blood cell analysis included: complete white blood cells, lymphocytes,  
188 monocytes, neutrophils, eosinophils, basophils, red blood cells, hematocrit, hemoglobin and  
189 platelets.

#### 190 2.4. Serum biochemistry

191 Serum chemistry was performed using an automated VetScan VS2 Chemistry Analyzer  
192 (Abaxis, Inc., Union City, CA) according to the manufacturer's recommended protocol. The  
193 Comprehensive Diagnostic Profile reagent rotor was used to perform complete chemistry and  
194 electrolyte analysis on 14 blood components: ALP, alkaline phosphatase; CRE, creatine; GLOB,  
195 globulin; PHOS, Phosphorous; GLU, glucose; BUN, blood urea nitrogen; Na, sodium; K,  
196 potassium; calcium; ALT, alanine aminotransferase; AMY, amylase; ALB, albumin; TBIL, total  
197 bilirubin; TP, total protein. Briefly, 100 µl of serum was added to the sample port of the reagent  
198 rotor, which was subsequently run in the machine.

#### 199 2.5. RNA extraction and quantitative real-time reverse transcription PCR (RT-qPCR)

200 SARS-CoV-2-specific RNA was detected using a quantitative reverse transcription real  
201 time -PCR (RT-qPCR) assay. Briefly, tissue homogenates in VTM, blood, CSF, BALF, urine, and  
202 nasal, oropharyngeal and rectal swabs in VTM were mixed with an equal volume of RLT RNA  
203 stabilization/lysis buffer (Qiagen, Germantown, MD, USA), and 200µl of sample lysate was then  
204 used for extraction using a magnetic bead-based nucleic acid extraction kit (GeneReach USA,  
205 Lexington, MA) on an automated Taco<sup>TM</sup> mini nucleic acid extraction system (GeneReach USA,  
206 Lexington, MA) according to the manufacturer's protocol with the following modifications: beads  
207 were added to the lysis buffer in the first well followed by the RLT sample lysate, then by the  
208 addition of 200 µl molecular grade isopropanol (ThermoFisher Scientific, Waltham, MA, USA),  
209 and finally, the last wash buffer B was replaced with 200 proof molecular grade ethanol

210 (ThermoFisher Scientific, Waltham, MA, USA). Extraction positive controls (IDT, IA, USA;  
211 2019-nCoV\_N\_Positive Control, diluted 1:100 in RLT) and negative controls were employed.

212 Quantification of SARS-CoV-2 RNA was performed using the N2 SARS-CoV-2 primer  
213 and probe sets (see: [https://www.idtdna.com/pages/landing/coronavirus-research-reagents/cdc-](https://www.idtdna.com/pages/landing/coronavirus-research-reagents/cdc-assays)  
214 [assays](https://www.idtdna.com/pages/landing/coronavirus-research-reagents/cdc-assays)) in a RT-qPCR protocol established by the CDC for the detection of SARS-CoV-2  
215 nucleoprotein (N)-specific RNA (<https://www.fda.gov/media/134922/download>). This protocol  
216 has been validated in our lab for research use, using the qScript XLT One-Step RT-qPCR Tough  
217 Mix (Quanta BioSciences, Beverly, MA, USA) on the CFX96 Real-Time thermocycler (BioRad,  
218 Hercules, CA, USA) using a 20-minute reverse transcription step and 45 cycle qPCR in a 20  $\mu$ l  
219 reaction volume. A reference standard curve method using a 10-point standard curve of  
220 quantitated viral RNA (USA-WA1/2020 isolate) was used to quantify RNA copy number. RT-  
221 qPCR was performed in duplicate wells with a quantitated PCR positive control (IDT, IA, USA;  
222 2019-nCoV\_N\_Positive Control, diluted 1:100) and four non-template control (NTC) on every  
223 plate. A positive Ct cut-off of 40 cycles was used. Data are presented as the mean and standard  
224 deviation of the calculated N gene copy number per ml of liquid sample or per mg of a 20% tissue  
225 homogenate.

## 226 2.6. *Virus neutralizing antibodies*

227 Virus neutralizing antibodies in sera were determined using microneutralization assay.  
228 Briefly, serum samples were initially diluted 1:10 and heat-inactivated at 56°C for 30 minutes  
229 while shaking. Subsequently, 100  $\mu$ l per well of serum samples in duplicates were subjected to 2-  
230 fold serial dilutions starting at 1:20 through 1:2560 in 100  $\mu$ l culture media. Then, 100  $\mu$ l of 100  
231 TCID<sub>50</sub> of SARS-CoV-2 virus in DMEM culture media was added to 100  $\mu$ l of the sera dilutions  
232 and incubated for 1 h at 37 °C. The 200  $\mu$ l per well of virus sera mixture was then cultured on

233 VeroE6 cells in 96-well plates. The corresponding SARS-CoV-2-negative cat sera, virus only and  
234 media only controls were also included in the assay. The neutralizing antibody titer was recorded  
235 as the highest serum dilution at which at least 50% of wells showed virus neutralization (NT<sub>50</sub>)  
236 based on the appearance of CPE observed under a microscope at 72 h post infection.

### 237 2.7. *Detection of SARS-CoV-2 antibodies by indirect ELISA*

238 To detect SARS-CoV-2 antibodies in sera, indirect ELISAs were performed with the  
239 recombinant viral proteins, nucleoprotein (N) and the receptor-binding domain (RBD), which were  
240 produced in-house. The N protein was produced in *E. coli* with a C-terminal His-Tag, and RBD  
241 was expressed in mammalian cells with a C-terminal Strep-Tag, and each were purified using  
242 either Ni-NTA (ThermoFisher Scientific, Waltham, MA, USA) or Strep-Tactin (IBA Lifesciences,  
243 Goettingen, Germany) columns, respectively, according to the manufacturers' instructions. An  
244 optimal concentration of the respective coating antigen was first determined by checkerboard  
245 titration using SARS-CoV-2 positive and negative cat sera.

246 For indirect ELISAs, wells were coated with 100 ng of the respective protein in 100 µl per  
247 well coating buffer (Carbonate-bicarbonate buffer, catalogue number C3041, Sigma-Aldrich, St.  
248 Louis, MO, USA), then covered and incubated overnight at 4 °C. The next day, the plates were  
249 washed 2 times with phosphate buffered saline (PBS [pH=7.2-7.6]; catalogue number P4417,  
250 Sigma-Aldrich, St. Louis, MO, USA), blocked with 200 µl per well casein blocking buffer (Sigma-  
251 Aldrich, catalogue number B6429, St. Louis, MO, USA) and incubated for 1 h at room  
252 temperature. The plates were then washed 3 times with PBS-Tween20 (PBS-T; 0.5% Tween20 in  
253 PBS). Serum samples were pre-diluted 1:400 in casein blocking buffer, then 100 µl per well was  
254 added to the ELISA plate and incubated for 1 h at room temperature. Serial dilutions of the cat  
255 sera were not performed. The wells were washed 3 times with PBS-T, then 100 µl of Goat anti-

256 Feline IgG (H+L) Secondary Antibody, HRP (ThermoFisher Scientific, catalogue number  
257 A18757, Waltham, MA, USA) diluted 1:2500 was added to each well and incubated for 1 h at  
258 room temperature. After 1 h, plates were washed 5 times with PBS-T, and 100 µl of TMB ELISA  
259 Substrate Solution (Abcam, catalogue number ab171525, Cambridge, MA, USA) was added to all  
260 wells of the plate. Following incubation at room temperature for 5 minutes, the reaction was  
261 stopped by adding 100 µl of 450 nm Stop Solution for TMB Substrate (Abcam, catalogue number  
262 ab171529, Cambridge, MA, USA) to all wells. The OD of the ELISA plates were read at 450 nm  
263 on an ELx808 BioTek plate reader (BioTek, Winooski, VT, USA). The cut-off for a sample being  
264 called positive was determined as follows: Average OD of negative serum + 3X standard  
265 deviation. Everything above this cut-off was considered as positive.

## 266 2.8. *Gross pathology and histopathology*

267 During *postmortem* examination, the head including the entire upper respiratory tract and  
268 central nervous system (brain), trachea and lower respiratory tract, lymphatic and cardiovascular  
269 systems GI and urogenital system, and integument were evaluated. CSF was collected with a  
270 syringe and needle via the atlanto-occipital (C0-C1) joint. Lungs were evaluated for gross  
271 pathology such as edema, congestion, discoloration, atelectasis, and consolidation. Tissue samples  
272 from the respiratory tract, nasal turbinates (rostral and deep), trachea (multiple levels; **Figure S2B**)  
273 and all 6 lung lobes (**Figure S2C**), GI (stomach, small and large intestine) and various other  
274 organs and tissues (spleen, kidney, liver, heart, tonsils, tracheo-bronchial and mesenteric lymph  
275 nodes, brain including olfactory bulb, and bone marrow) were collected and either fixed in 10%  
276 neutral-buffered formalin for histopathologic examination or frozen for RT-qPCR testing (see  
277 above section 2.2.3 and 2.5). Additional tissues placed in formalin for histological evaluation  
278 include the thymus, eye, salivary gland, skin (lip, eye lids, external nares, and ear), larynx, testes,

279 adrenal gland, base of the tongue, urinary bladder and third eyelid. Tissues were fixed in formalin  
280 for 7 days then were transferred to 70% ethanol (ThermoFisher Scientific, Waltham, MA, USA)  
281 prior to trimming for embedding. Tissues were routinely processed and stained with hematoxylin  
282 and eosin following standard procedures within the histology laboratories of the Kansas State  
283 Veterinary Diagnostic Laboratory (KSVDL) and the Louisiana Animal Disease Diagnostic  
284 Laboratory (LADDL). Several veterinary pathologists independently examined slides and were  
285 blinded to the treatment groups.

#### 286 *2.9. SARS-CoV-2-specific RNAscope<sup>®</sup> in situ hybridization (RNAscope<sup>®</sup> ISH)*

287 For RNAscope<sup>®</sup> ISH, an anti-sense probe targeting the spike (S; nucleotide sequence:  
288 21,563-25,384) of SARS-CoV-2, USA-WA1/2020 isolate (GenBank accession number  
289 MN985325.1) was designed (Advanced Cell Diagnostics [ACD], Newark, CA, USA) and used as  
290 previously described (Carossino et al. 2020). Four-micron sections of formalin-fixed paraffin-  
291 embedded tissues were mounted on positively charged Superfrost<sup>®</sup> Plus Slides (VWR, Radnor,  
292 PA, USA). The RNAscope<sup>®</sup> ISH assay was performed using the RNAscope 2.5 HD Red Detection  
293 Kit (ACD) as previously described (Carossino et al. 2019; Carossino et al. 2020). Briefly,  
294 deparaffinized sections were incubated with a ready-to-use hydrogen peroxide solution for 10 min  
295 at room temperature and subsequently subjected to Target Retrieval for 15 min at 98-102 °C in 1X  
296 Target Retrieval Solution. Tissue sections were dehydrated in 100% ethanol for 10 min and treated  
297 with Protease Plus for 20 min at 40 °C in a HybEZ<sup>™</sup> oven (ACD). Slides were subsequently  
298 incubated with a ready-to-use probe mixture for 2 h at 40 °C in the HybEZ<sup>™</sup> oven, and the signal  
299 amplified using a specific set of amplifiers (AMP1-6 as recommended by the manufacturer). The  
300 signal was detected using a Fast-Red solution (Red B: Red A in a 1:60 ratio) for 10 minutes at  
301 room temperature. Slides were counterstained with 50% Gill hematoxylin I (Sigma Aldrich, St

302 Louis, MO, USA) for 2 min, and bluing performed with a 0.02% ammonium hydroxide in water.  
303 Slides were finally mounted with Ecomount<sup>®</sup> (Biocare, Concord, CA, USA). Sections from mock-  
304 and SARS-CoV-2-infected Vero cell pellets were used as negative and positive assay controls.

#### 305 *2.10. SARS-CoV-2-specific immunohistochemistry (IHC)*

306 For IHC, four-micron sections of formalin-fixed paraffin-embedded tissue were mounted on  
307 positively charged Superfrost<sup>®</sup> Plus slides and subjected to IHC using a SARS-CoV-2-specific  
308 anti-nucleocapsid mouse monoclonal antibody (clone 6F10, BioVision, Inc., Milpitas, CA, USA)  
309 as previously described (Carossino et al., 2020). IHC was performed using the automated BOND-  
310 MAX and the Polymer Refine Red Detection kit (Leica Biosystems, Buffalo Grove, IL, USA), as  
311 previously described (Carossino et al. 2019). Following automated deparaffinization, heat-  
312 induced epitope retrieval (HIER) was performed using a ready-to-use citrate-based solution (pH  
313 6.0; Leica Biosystems) at 100 °C for 20 min. Sections were then incubated with the primary  
314 antibody (diluted at 1 µg/ml in Antibody Diluent [Dako, Carpinteria, CA]) for 30 min at room  
315 temperature, followed by a polymer-labeled goat anti-mouse IgG coupled with alkaline  
316 phosphatase (30 minutes; Powervision, Leica Biosystems). Fast Red was used as the chromogen  
317 (15 minutes), and counterstaining was performed with hematoxylin. Slides were mounted with a  
318 permanent mounting medium (Micromount<sup>®</sup>, Leica Biosystems). Sections from mock- and  
319 SARS-CoV-2-infected Vero cell pellets were used as negative and positive assay controls.

320

321           **3.           Results**

322           *SARS-CoV-2-infected domestic cats remain subclinical.*

323           Body temperature and clinical signs were recorded daily. No remarkable clinical signs were  
324 observed over the course of the study. At 2 DPC, some of the infected cats developed a  
325 temperature above 38.7 °C, but otherwise body temperature remained within the normal range for  
326 the remainder of the study. Body temperatures of sentinels were elevated at 1-, 10- and 12-days  
327 post contact (DPCo), but otherwise remained within normal range [**Figure S1A**]. Body weights  
328 of all cats increased throughout the study as expected for young animals without clinical disease  
329 [**Figure S1B**]. Complete blood counts and serum biochemistry were performed on days -1, 1, 3,  
330 5, 7, 10, 14, and 21 DPC for the principal infected cats, and 2, 4, 6, 9, 13 and 20 DPCo for the  
331 sentinels. Overall, no significant changes in most blood cell parameters or serum biochemistry  
332 were observed. White blood cell (WBC) counts remained within normal limits for most animals  
333 during the course of the study; mildly increased WBC counts observed at -1 DPC and 1 DPC were  
334 attributed to stress early in the course of the study. No significant changes were observed in serum  
335 biochemical analytes except elevated alkaline phosphatase (ALP) levels in many animals starting  
336 at 5 DPC in the sentinels and after 7 DPC in the principal infected animals [**Figure S1C**], which  
337 might indicate growth of subadult animals.

338           *SARS-CoV-2 RNA found throughout the respiratory tract.*

339           SARS-CoV-2 RNA was detected in nasal swabs of the principal infected cats at 1 through  
340 10 DPC, with maximal quantities observed from 1 through 5 DPC (**Figure 2A**). The nasal swabs  
341 of contact animals became RNA positive for SARS-CoV-2 starting at day 2 DPCo (i.e. 3 DPC)  
342 and remained positive up to 9 DPCo/10 DPC, with a maximum on day 6 DPCo/7 DPC that is  
343 nearly as high as the copy number detected in the principal infected animals at 1 through 5 DPC



344 **(Figure 2A)**. The oropharyngeal swabs were RNA positive starting at 1 DPC through 10 DPC for  
345 the principals and 2 DPCo through 4 DPCo for the sentinels, with a maximum on 4 DPC and 4  
346 DPCo, respectively **(Figure 2B)**. Overall viral RNA in oropharyngeal swabs was approximately  
347 1 to 2 logs lower than what was seen in the nasal swabs, for all cats except the principal infected  
348 at 4 DPC.

349 Viral RNA was also detected in respiratory tract tissues in principal infected animals **(Figure**  
350 **3A, B)**. Fresh tissues collected during *postmortem* examination [see **Figure S2A, B, C**] from the  
351 nasal cavity, trachea, bronchi and all lung lobes were RNA positive for all animals at 4 and 7 DPC  
352 **(Figure 3A, B)**, with RNA copy number ranging from  $10^7$  to  $10^{11}$  CN/mL for nearly all cats  
353 necropsied at these time points. Viral RNA levels in the lungs tended to be lower than the upper  
354 respiratory tract for cats necropsied at 7 DPC **(Figure 3B)**. At 21 DPC viral RNA was detected  
355 within the upper respiratory samples, i.e. bronchi and right caudal lung lobe **(Figure 3A, B)**. Nasal  
356 washes and BALF collected at necropsy from all principal infected cats examined at 4 and 7 DPC  
357 were RNA positive, but negative from the cat evaluated at 21 DPC **(Table 2)**.

358 Gross pathology of the respiratory tract was accessed during *postmortem* examination. The  
359 lungs were removed *in toto* from each animal at 4, 7 and 21 DPC and demonstrated varying degree  
360 and distribution of edema, discoloration, congestion and atelectasis **(data not shown)**; this could  
361 be attributed to euthanasia. Histologically, the pathological changes were limited to the upper and  
362 lower airways (larynx, trachea, and main, lobar and segmental bronchi of the lungs) of SARS-  
363 CoV-2 principal infected cats. Pathological findings are characterized by multifocal lymphocytic  
364 and neutrophilic tracheobronchoadenitis of seromucous lands of the lamina propria and submucosa  
365 of the trachea and bronchi. Changes range from minimal to mild at 4 DPC and progress to mild  
366 to moderate by 7 DPC **(Figures 4, and Figure S3)**. Affected submucosal glands and associated



367 ducts were variably distended (ectatic), lined by attenuated epithelium, contain various amounts  
368 of necrotic cell debris. In more severely affected foci glands are poorly delineated, and disrupted  
369 by mild to moderate numbers of infiltrating lymphocytes, macrophages and plasma cells, and few  
370 neutrophils (**Figure 4, and Figure S3**). No significant pathology was identified elsewhere in the  
371 pulmonary parenchyma (bronchioles, pulmonary vessels, alveolar spaces, alveolar septa and  
372 visceral pleura) of SARS-CoV-2-infected cats on 4 and 7 DPC. No significant histologic changes  
373 were noted in the respiratory tract at 21 DPC, with the submucosal architecture of the trachea and  
374 bronchi being unremarkable and within normal limits (**Figure 4, and Figure S3**).

375 The cellular tropism, distribution and abundance of SARS-CoV-2 were also investigated via  
376 the detection of viral RNA and viral antigen by RNAscope<sup>®</sup> ISH and IHC, respectively. Presence  
377 of viral RNA and antigen correlated with the histological changes observed in the airways and  
378 were detected within epithelial cells of submucosal glands and associated ducts at 4 and 7 DPC  
379 (**Figure 5, and Figure S4**). SARS-CoV-2-positive submucosal glands were more frequently  
380 observed at 4 DPC compared to 7 DPC (**Figure 5, and Figure S4**). Viral RNA and viral antigen  
381 were not detected at 21 DPC (**Figure 5, and Figure S4**). Noteworthy, no viral RNA or antigen  
382 were detected within lining epithelial cells or elsewhere in the pulmonary parenchyma, including  
383 smaller airways (i.e. bronchioles) and alveoli, at 4, 7 or 21 DPC.

#### 384 *SARS-CoV-2 RNA found throughout non-respiratory organs and tissues*

385 SARS-CoV-2 RNA was detected in rectal swabs starting at 3 DPC for principal infected cats  
386 and 2 DPCo for sentinel cats and were found positive up to 14 DPC or 13 DPCo, respectively.  
387 High level of RNA shedding was maintained from 3 DPC or 2 DPCo throughout 14 DPC or 13  
388 DPCo before animals became RNA negative by 21 DPC or 20 DPCo for both principal infected  
389 and sentinel cats (**Figure 2C**). Urine collected directly from the bladder during *postmortem*

390 examination of cats sacrificed at 4, 7, 21 DPC was negative by RT-qPCR (**Table 2**). Viral RNA  
391 was also detected in the GI tract and other organs and tissues in principal infected animals, such  
392 as tonsils, spleen, lymph nodes, kidney, liver, heart, bone marrow and olfactory bulb (**Figure 3C,**  
393 **D**). Tonsils, lymph nodes and olfactory bulbs of all cats were positive on 4, 7, and 21 DPC. The  
394 highest CN of RNA was detected in the tonsils, tracheobronchial and mesenteric lymph nodes at  
395 all days tested. Spleen was negative on 4 DPC, but all animals were positive on 7 and 21 DPC.  
396 RNA was present in the pooled tissue from the GI tract and heart in all animals on 4 and 7 DPC.  
397 Liver, kidney, and bone marrow were occasionally positive on different time points post infection.  
398 CSF was RT-qPCR positive from 1 of the 2 cats necropsied at 4 DPC and 1 of 2 cats necropsied  
399 at 7 DPC, but not at 21 DPC (**Figure 3D**, and **Table 2**). Blood from all cats collected at -1, 1, 3,  
400 5, 7, 10, 14 and 21 DPC were RT-qPCR negative for SARS-CoV-2. Gross evaluation of the GI  
401 tract, the cardiovascular and central nervous system as well as additional visceral organs and  
402 lymphoid tissues revealed no macroscopic changes between SARS-CoV-2 and mock-infected cats  
403 at any time-point post infection. Additionally, no histopathological changes were identified in  
404 multiple segments of the GI tract or in other organs examined so far.

#### 405 *Seroconversion of cats after SARS-CoV-2 infection.*

406 Sera collected at -1, 3, 5, 7, 10, 14 and 21 DPC was tested for the presence of SARS-CoV-2  
407 specific antibodies. Virus neutralizing antibodies were detected in sera from all principal infected  
408 and contact sentinel cats at 10, 14 and 21 DPC, with neutralizing titers ranging from 1:40 to 1:320  
409 (**Table 3**). Sera from principal or sentinel animals tested before 7 or 10 DPC were negative for  
410 neutralizing antibodies, respectively. Antibodies against the N protein were detected in all  
411 principal-infected cats starting at 7 DPC and in the two sentinel cats after 9 DPCo throughout the  
412 end of the observation period of 21 DPC (**Table 3**). Similarly, antibodies against the receptor

413 binding domain protein were detected in all principal infected starting at 7 DPC and in the sentinel  
414 cats starting at 13 DPCo throughout the end of the observation period of 21 DPC.  
415

#### 416           **4.           Discussion**

417           Identifying susceptible species and their capacity to transmit SARS-CoV-2 is critical for the  
418           determination of likely sources of reverse zoonosis and for mitigating viral spread. The  
419           development of animal models for COVID-19 is equally critical for studying the mechanisms of  
420           the disease and for evaluating the efficacy of potential vaccines, antiviral drugs and therapies. In  
421           this study we explored in-depth the infection, associated disease and transmission dynamics in 4-  
422           to 5-months old domestic cats. The cats were antibody profile defined/specific pathogen free  
423           (APD/SPF) animals with no antibody titers against various feline virus infections including feline  
424           coronaviruses. The detection of high levels of viral RNA from swab samples and in various organs  
425           and tissues, along with mild to moderate histologic changes in trachea and bronchi associated with  
426           viral RNA and viral antigen, and the development of SARS-CoV-2-specific antibodies  
427           demonstrates that cats were productively infected, without developing any obvious clinical signs.  
428           Viral RNA was detected at 4 and 7 DPC throughout the upper and lower respiratory tracts, GI  
429           tract, olfactory bulb, and lymphoid and other tissues of all inoculated cats; viral RNA was mostly  
430           cleared by 21 DPC in the lungs, BALF, nasal washes and other tissues including GI tract, but  
431           persisted in the upper respiratory tract, and lymphoid tissue. In contrast, viral RNA was detected  
432           in the spleen only at 7 and 21 DPC, but not at 4 DPC. Absence of viral RNA shedding and  
433           histologic changes in the lungs and trachea at 21 DPC as well as seroconversion suggests that the  
434           cats were responding to experimental SARS-CoV-2 infection by mounting a humoral immune  
435           response and recovering from the infection at 3-weeks post experimental inoculation.  
436           Furthermore, the principal infected cats were able to transmit the virus to negative contact animals  
437           within 2 days of contact housing similar as reported by Halfmann and coworkers (2020). High  
438           amounts of viral RNA shedding through the respiratory and GI tract are most likely responsible

439 for the transmission to the sentinel animals. Shi and coworkers (2020) determined that airborne  
440 transmission of SARS-CoV-2 among cats is possible but not highly effective.

441 Our results, the studies by Shi et al. (2020) and Halfmann et al. (2020), as well as the reports  
442 of pet cats in households with COVID-19 patients (Newman, Smith et al. 2020; Leroy, Gouilh et  
443 al. 2020), show that felines are susceptible to SARS-CoV-2 infection and could be potential virus  
444 reservoirs. Consistent with our results, Shi et al. (2020) and Halfmann et al. (2020) also reported  
445 no obvious clinical signs in SARS-CoV-2 infected cats which were older than 4 months. We  
446 detected high viral RNA levels throughout nearly all tissues tested for all cats at 4 and 7 DPC, with  
447 reduced levels or clearing by 21 DPC in some tissues: residual RNA was detected mainly in the  
448 upper respiratory tract, the lymphoid tissues and the CNS. Since no virus was detected in blood, it  
449 remains to be studied how the virus reaches and infects non-respiratory tissues. Shi and colleagues  
450 (2020) also reported that viral RNA and infectious virus was detected throughout upper and lower  
451 respiratory tracts in juvenile (70-100 days old) and subadult cats (6-9 months old) at 3 DPC but it  
452 was cleared from most lung tissues of subadult cats by 6 DPC; however, in juvenile cats, viral  
453 RNA and infectious virus was still present on 6 DPC in the lower respiratory tract (Shi et al., 2020).  
454 In contrast, no viral RNA or virus was detected in other organs of any of these cats which included  
455 brain, heart, submaxillary lymph nodes, kidney, spleen, liver, and pancreas at 3 or 6 DPC (Shi,  
456 Wen et al. 2020). Similar to Shi and colleagues (2020) who detected viral RNA and infectious  
457 virus in the small intestine of most of the animals we found shedding of viral RNA in rectal swabs  
458 up to 14 DPC and viral RNA in pooled GI tract tissues on 4 and 7 DPC. In contrast, Halfmann  
459 and coworkers (2020) found all rectal swabs to be virus negative. These differences may be  
460 explained by the age of the cats used in these studies, and the different virus strains used. Shi et  
461 al. (2020) were also describing SARS-CoV-2 associated pathological changes in juvenile and

462 subadult cats, and noticed more severe pathology was associated with the juvenile cats, including  
463 histopathological lesions in nasal and tracheal mucosal epithelia and lungs (Shi, Wen et al. 2020).  
464 Our results are consistent with that study, showing cats 4 to 5 months of age had mild to moderate  
465 histologic alterations identified as tracheobronchoadenitis within the airways. The macroscopic  
466 lung lesions observed at *postmortem* examinations were most likely due to the euthanasia with  
467 barbiturates. Importantly, all SARS-CoV-2 infected cats (principal and sentinel animals) in our  
468 study mounted an antiviral and neutralizing antibody response during the 21-day observation  
469 period. Virus specific antibodies to the N and RBD proteins were detected in all principal animals  
470 starting at 7 DPC as well as virus neutralizing antibodies. Other studies reported detection of IgG  
471 antibodies against RBD as early as 1 DPC (Halfmann, Hatta et al. 2020), and virus specific and  
472 neutralizing antibodies in all principal inoculated cats, but only in 2 out of the 6 sentinel animals  
473 (Shi, Wen et al. 2020). None of these studies detected virus or viral RNA in the blood.

474         Similar to previous experimental infection studies with SARS-CoV-1 (Martina, Haagmans  
475 et al. 2003; van den Brand et al. 2008) and more recently SARS-CoV-2 (Shi, Wen et al. 2020) in  
476 cats, histological changes within the airways (namely trachea and main, lobar and segmental  
477 bronchi) under our experimental infection conditions with SARS-CoV-2 in cats are limited to mild  
478 to moderate neutrophilic and lymphocytic tracheobronchoadenitis with associated intralesional  
479 detection of viral RNA and viral antigen. While SARS-CoV-1 antigen was identified in sporadic  
480 tracheal and bronchial epithelial cells in a single experimentally infected cat (Martina, Haagmans  
481 et al. 2003; van den Brand, Haagmans et al. 2008), we determined that the airway epithelial lining  
482 of the trachea and the main, lobar and segmental bronchi seems non-permissive to SARS-CoV-2  
483 replication *in vivo* at least in subadult cats (4- to 5-months old) as demonstrated by the lack of viral  
484 RNA and viral antigen within these specific cells using RNAscope® ISH and IHC; this correlated

485 with the lack of histologic alterations on the surface epithelium other than sporadic neutrophil  
486 transmigration. These findings are in partial agreement to those of another recent study on the  
487 susceptibility of cats to SARS-CoV-2 infection (Shi, Wen et al. 2020), where mild histologic  
488 alterations in the tracheal lumen and epithelium were reported in the absence of detectable viral  
489 antigen. Interestingly, and in contrast with reports of SARS-CoV-1 infection in cats, SARS-CoV-  
490 2 infected 4- to 5-months old cats did not demonstrate histological changes within the small  
491 airways or the pulmonary parenchyma consistent with interstitial pneumonia or diffuse alveolar  
492 damage (DAD)/acute respiratory distress syndrome (ARDS), such as inflammatory infiltrates  
493 within alveolar septa or alveolar spaces, intra-alveolar fibrin or hyaline membranes, or pneumocyte  
494 type II hyperplasia. In addition, there is no evidence of SARS-CoV-2 infection within  
495 pneumocytes or alveolar macrophages as demonstrated by the absence of viral RNA (RNAscope®  
496 ISH) and viral antigen (IHC). These findings correlate with the absence of clinically evident  
497 respiratory disease following experimental infection, with the duration and magnitude of viral  
498 shedding, and with the onset of SARS-CoV-2 specific antibody responses; and with no histologic  
499 changes or viral RNA and viral antigen present within the respiratory tissues by 21 DPC. While a  
500 recent study evaluating the susceptibility of domestic cats to SARS-CoV-2 (Shi et al., 2020)  
501 suggested the occurrence of additional histologic alterations in the pulmonary vasculature and  
502 alveolar spaces, none of these changes were noted in our experimental model. Additional studies  
503 are needed to determine whether these differences are due to the breed and age of the domestic  
504 cats, the virus isolate used for infection or other factors.

505 Together these findings warrant COVID-19 screening of felines for  
506 surveillance/epidemiological purposes and for implementing of mitigation strategies; they also  
507 point towards nasal swabs/washes and rectal swabs as appropriate diagnostic samples. This

508 information will be important for providing appropriate veterinary care for infected cats and other  
509 cats in their surroundings, for protection of veterinary personnel, animal caretakers and pet owners,  
510 and for implementing quarantine measures to prevent transmission between felines, people and  
511 potentially other susceptible animals. The ease of transmission between domestic cats indicates a  
512 significant public health necessity to investigate the potential chain of human-cat-human  
513 transmission potential. It is also critical that pet owners are educated on the risks and preventative  
514 measures in order to calm fears and discourage animal abandonment.

515         Although asymptomatic, cats can be productively infected and readily transmit SARS-CoV-  
516 2 to other susceptible cats, and thus may serve as potential models for asymptomatic COVID-19  
517 infections in humans. It could also offer a viable model for testing vaccines and antiviral  
518 candidates for companion animals and for drugs with a problematic pharmacokinetic profile in  
519 rodents, ferrets or nonhuman primates. However, a preclinical animal model that represents the  
520 clinical symptoms and disease observed in severe COVID-19 patients is still needed to improve  
521 evaluation of vaccines, antiviral drugs and other therapies.

522         Further research is needed to adapt models to recapitulate severe disease observed in humans.  
523 One area to explore is the effect of age on associated disease and recovery. Only cats less than 1  
524 year old were evaluated in this study and the studies by Shi et al. (2020) and Halfmann et al.  
525 (2020), but what SARS-CoV-2 infection looks like in adult and older aged cats, as well as, if re-  
526 infection of cats can occur and what re-infection looks like was not explored in these studies.  
527 Recent non peer-reviewed work by Bosco-Lauth and colleagues (2020) investigated experimental  
528 SARS-CoV-2 challenge and direct transmission in adult cats 5 to 8 years old, and re-infection after  
529 28 DPC. The results from that study demonstrate that adult cats become infected without clinical  
530 signs with pathology limited to respiratory airways, and can readily transmit the virus to naïve



531 cats. Furthermore, the adult cats appear to be protected from reinfection and mounted significantly  
532 higher neutralizing antibody responses compared to findings from our study and by Shi et al.  
533 (2020). Studies to better understand the mechanisms of infection and the range of symptoms and  
534 pathology associated with SARS-CoV-2 in various preclinical models of COVID-19 are critical  
535 for the development of vaccines and treatments of this disease.

## 536 **Acknowledgments**

537           We gratefully thank the staff of KSU Biosecurity Research Institute, the histological  
538 laboratory at the Kansas State Veterinary Diagnostic Laboratory (KSVDL), members of the  
539 Histology and Immunohistochemistry sections at the Louisiana Animal Disease Diagnostic  
540 Laboratory (LADDL), the CMG staff and Gleyder Roman-Sosa, Yonghai Li, Emily Gilbert-  
541 Esparza, Chester McDowell at KSU, and Drs. James MacLachlan and Dennis Wilson at the School  
542 of Veterinary Medicine, University of California, Davis for their expert pathology consultations.  
543 The following reagent was obtained through BEI Resources, National Institute of Allergy and  
544 Infectious Diseases (NIAID), National Institutes of Health (NIH): SARS-CoV-2 Virus strain USA-  
545 WA1/2020 (catalogue # NR-52281).

546

## 547 **Funding**

548           Funding for this study was provided through grants from NBAF Transition Funds, the  
549 NIAID Centers of Excellence for Influenza Research and Surveillance under contract  
550 number HHSN 272201400006C and the Department of Homeland Security Center of Excellence  
551 for Emerging and Zoonotic Animal Diseases under grant no. 2010-ST061-AG0001 to JAR. This  
552 study was also partially supported by the Louisiana State University, School of Veterinary  
553 Medicine start-up fund (PG 002165) to UBRB and the U.S. Department of Agriculture,  
554 Agricultural Research Service (58-32000-009-00D) to WCW, by the Center for Research for  
555 Influenza Pathogenesis (CRIP), a NIAID supported Center of Excellence for Influenza Research  
556 and Surveillance (CEIRS, contract # HHSN272201400008C), and by the generous support of the  
557 JPB Foundation, the Open Philanthropy Project (research grant 2020-215611 (5384)) and  
558 anonymous donors to AG-S.

559 Mention of trade names or commercial products in this publication is solely for the purpose of  
560 providing specific information and does not imply recommendation or endorsement by the U.S.  
561 Department of Agriculture. USDA is an equal opportunity provider and employer.

562

563 **Declaration of conflict of interest**

564           The authors declared no potential conflicts of interest with respect to the research,  
565 authorship, and/or publication of this article.

566

567 **References**

- 568 Andersen, K. G., A. Rambaut, W. I. Lipkin, E. C. Holmes and R. F. Garry (2020). "The proximal  
569 origin of SARS-CoV-2." Nat Med **26**(4): 450-452.
- 570 Bosco-Lauth, A. M., A. E. Hartwig, S. M. Porter, P. W. Gordy, M. Nehring, A.  
571 D. Byas, S. VandeWoude, I. K. Ragan, R. M. Maison, R. A. Bowen. "Pathogenesis,  
572 transmission and response to re-exposure of SARS-CoV-2 in domestic cats."  
573 bioRxiv 2020.05.28.120998; doi: <https://doi.org/10.1101/2020.05.28.120998>
- 574 Carossino, M., P. Dini, T. S. Kalbfleisch, A. T. Loynachan, I. F. Canisso, R. F. Cook, P. J.  
575 Timoney and U. B. R. Balasuriya (2019). "Equine arteritis virus long-term persistence is  
576 orchestrated by CD8+ T lymphocyte transcription factors, inhibitory receptors, and the  
577 CXCL16/CXCR6 axis." PLoS Pathog **15**(7): e1007950.
- 578 Carossino M., Ip H. S., Richt J. A., Shultz K., Harper K., Loynachan A. T., Del Piero F.,  
579 Balasuriya U. B. R. (2020) "Detection of SARS-CoV-2 by RNAscope® in  
580 situ Hybridization and Immunohistochemistry Techniques." Arch Virol In Press  
581 DOI: 10.1007/s00705-020-04737-w
- 582 Cleary, S. J., S. C. Pitchford, R. T. Amison, R. Carrington, C. L. Robaina Cabrera, M. Magnen,  
583 M. R. Looney, E. Gray and C. P. Page (2020). "Animal models of mechanisms of SARS-  
584 CoV-2 infection and COVID-19 pathology." Br J Pharmacol 10.1111/bph.15143.  
585 Advance online publication. <https://doi.org/10.1111/bph.15143>
- 586 Corman, V. M., D. Muth, D. Niemeyer and C. Drosten (2018). "Hosts and Sources of Endemic  
587 Human Coronaviruses." Adv Virus Res **100**: 163-188.
- 588 de Wit, E., N. van Doremalen, D. Falzarano and V. J. Munster (2016). "SARS and MERS: recent  
589 insights into emerging coronaviruses." Nature Reviews Microbiology **14**(8): 523-534.
- 590 Drexler, J. F., V. M. Corman and C. Drosten (2014). "Ecology, evolution and classification of  
591 bat coronaviruses in the aftermath of SARS." Antiviral Res **101**: 45-56.
- 592 Fehr, A. R. and S. Perlman (2015). "Coronaviruses: an overview of their replication and  
593 pathogenesis." Methods Mol Biol **1282**: 1-23.
- 594 Fung, T. S. and D. X. Liu (2019). "Human Coronavirus: Host-Pathogen Interaction." Annu Rev  
595 Microbiol **73**: 529-557.
- 596 Gorbalenya, A.E., Baker, S.C., Baric, R.S. et al. (2020) "The species Severe acute respiratory  
597 syndrome-related coronavirus: classifying 2019-nCoV and naming it SARS-CoV-2." Nat  
598 Microbiol **5**: 536–544. <https://doi.org/10.1038/s41564-020-0695-z>
- 599 Halfmann, P. J., M. Hatta, S. Chiba, T. Maemura, S. Fan, M. Takeda, N. Kinoshita, S. I. Hattori,  
600 Y. Sakai-Tagawa, K. Iwatsuki-Horimoto, M. Imai and Y. Kawaoka (2020).  
601 "Transmission of SARS-CoV-2 in Domestic Cats." N Engl J Med.

- 602 Hernandez, M., D. Abad, J. M. Eiros and D. Rodriguez-Lazaro (2020). "Are Animals a  
603 Neglected Transmission Route of SARS-CoV-2?" Pathogens **9**(6).
- 604 Hierholzer, J. C. and R. A. Killington (1996). 2 - Virus isolation and quantitation A2 - Mahy,  
605 Brian WJ. Virology Methods Manual. H. O. Kangro. London, Academic Press: 25-46.
- 606 Lakdawala, S. S. and V. D. Menachery (2020). "The search for a COVID-19 animal model."  
607 Science **368**(6494): 942-943.
- 608 Leroy, E. M., M. Ar Gouilh and J. Brugere-Picoux (2020). "The risk of SARS-CoV-2  
609 transmission to pets and other wild and domestic animals strongly mandates a one-health  
610 strategy to control the COVID-19 pandemic." One Health: 100133.
- 611 Li, Q., X. Guan, P. Wu, X. Wang, L. Zhou, Y. Tong, R. Ren, K. S. M. Leung, E. H. Y. Lau, J. Y.  
612 Wong, X. Xing, N. Xiang, Y. Wu, C. Li, Q. Chen, D. Li, T. Liu, J. Zhao, M. Liu, W. Tu,  
613 C. Chen, L. Jin, R. Yang, Q. Wang, S. Zhou, R. Wang, H. Liu, Y. Luo, Y. Liu, G. Shao,  
614 H. Li, Z. Tao, Y. Yang, Z. Deng, B. Liu, Z. Ma, Y. Zhang, G. Shi, T. T. Y. Lam, J. T.  
615 Wu, G. F. Gao, B. J. Cowling, B. Yang, G. M. Leung and Z. Feng (2020). "Early  
616 Transmission Dynamics in Wuhan, China, of Novel Coronavirus-Infected Pneumonia." N  
617 Engl J Med **382**(13): 1199-1207.
- 618 Martina, B. E., B. L. Haagmans, T. Kuiken, R. A. Fouchier, G. F. Rimmelzwaan, G. Van  
619 Amerongen, J. S. Peiris, W. Lim and A. D. Osterhaus (2003). "Virology: SARS virus  
620 infection of cats and ferrets." Nature **425**(6961): 915.
- 621 Newman, A., D. Smith, R. R. Ghai, R. M. Wallace, M. K. Torchetti, C. Loiacono, L. S. Murrell,  
622 A. Carpenter, S. Moroff, J. A. Rooney and C. Barton Behravesh (2020). "First Reported  
623 Cases of SARS-CoV-2 Infection in Companion Animals - New York, March-April  
624 2020." MMWR Morb Mortal Wkly Rep **69**(23): 710-713.
- 625 Oreshkova, N., R. J. Molenaar, S. Vreman, F. Harders, B. B. Oude Munnink, R. W. Hakze-van  
626 der Honing, N. Gerhards, P. Tolsma, R. Bouwstra, R. S. Sikkema, M. G. Tacken, M. M.  
627 de Rooij, E. Weesendorp, M. Y. Engelsma, C. J. Brusckke, L. A. Smit, M. Koopmans,  
628 W. H. van der Poel and A. Stegeman (2020). "SARS-CoV-2 infection in farmed minks,  
629 the Netherlands, April and May 2020." Euro Surveill **25**(23).
- 630 Saif, L. J. (2004). "Animal coronaviruses: what can they teach us about the severe acute  
631 respiratory syndrome?" Rev Sci Tech **23**(2): 643-660.
- 632 Shi, J., Z. Wen, G. Zhong, H. Yang, C. Wang, B. Huang, R. Liu, X. He, L. Shuai, Z. Sun, Y.  
633 Zhao, P. Liu, L. Liang, P. Cui, J. Wang, X. Zhang, Y. Guan, W. Tan, G. Wu, H. Chen  
634 and Z. Bu (2020). "Susceptibility of ferrets, cats, dogs, and other domesticated animals to  
635 SARS-coronavirus 2." Science **368**(6494): 1016-1020.
- 636 van den Brand, J. M., B. L. Haagmans, L. Leijten, D. van Riel, B. E. Martina, A. D. Osterhaus  
637 and T. Kuiken (2008). "Pathology of experimental SARS coronavirus infection in cats  
638 and ferrets." Vet Pathol **45**(4): 551-562.

- 639 Woo, P. C., S. K. Lau, C. S. Lam, C. C. Lau, A. K. Tsang, J. H. Lau, R. Bai, J. L. Teng, C. C.  
640 Tsang, M. Wang, B. J. Zheng, K. H. Chan and K. Y. Yuen (2012). "Discovery of seven  
641 novel Mammalian and avian coronaviruses in the genus deltacoronavirus supports bat  
642 coronaviruses as the gene source of alphacoronavirus and betacoronavirus and avian  
643 coronaviruses as the gene source of gammacoronavirus and deltacoronavirus." J Virol  
644 **86**(7): 3995-4008.
- 645 Zhang, T., Q. Wu and Z. Zhang (2020). "Pangolin homology associated with 2019-nCoV."  
646 bioRxiv: 2020.2002.2019.950253.
- 647 Zhou, P., X. L. Yang, X. G. Wang, B. Hu, L. Zhang, W. Zhang, H. R. Si, Y. Zhu, B. Li, C. L.  
648 Huang, H. D. Chen, J. Chen, Y. Luo, H. Guo, R. D. Jiang, M. Q. Liu, Y. Chen, X. R.  
649 Shen, X. Wang, X. S. Zheng, K. Zhao, Q. J. Chen, F. Deng, L. L. Liu, B. Yan, F. X.  
650 Zhan, Y. Y. Wang, G. F. Xiao and Z. L. Shi (2020). "A pneumonia outbreak associated  
651 with a new coronavirus of probable bat origin." Nature **579**(7798): 270-273.
- 652

653 **Tables**

654

| <b>Table 1. Animal groups.</b> |           |          |                      |
|--------------------------------|-----------|----------|----------------------|
| Group                          | Treatment | Cat ID#s | Necropsy             |
| 1                              | Principal | 476, 493 | 4 DPC                |
| 1                              | Principal | 310, 597 | 7 DPC                |
| 1                              | Principal | 026      | 21 DPC               |
| 1                              | Principal | 328      | NA                   |
| 2                              | Sentinel  | 272, 903 | NA                   |
| 3                              | Mock      | 280, 403 | 3 DPC (not infected) |

NA=not available (enrolled in another study)

655

656

| <b>Table 2. Viral RNA (copy number/mL) detected in nasal washes, bronchoalveolar lung fluid (BALF), cerebrospinal fluid (CSF) and urine.</b> |     |              |         |          |       |
|----------------------------------------------------------------------------------------------------------------------------------------------|-----|--------------|---------|----------|-------|
| Cat ID#                                                                                                                                      | DPC | Nasal washes | BALF    | CSF      | Urine |
| 476                                                                                                                                          | 4   | 6.5E+08      | 5.9E+08 | 2.5E+04* | 0     |
| 493                                                                                                                                          | 4   | 7.5E+08      | 3.2E+08 | 0        | 0     |
| 310                                                                                                                                          | 7   | 6.3E+07      | 2.0E+08 | 3.6E+06  | 0     |
| 597                                                                                                                                          | 7   | 5.6E+07      | 4.6E+05 | 0        | 0     |
| 026                                                                                                                                          | 21  | 0            | 0       | 0        | 0     |

\* 1/2 RT-qPCRs below limit of detection

657

658

| <b>Table 3. Felines develop SARS-CoV-2 specific and virus neutralizing antibodies.</b> |                   |     |     |    |    |                     |   |    |    |    |                                                   |   |      |       |       |       |
|----------------------------------------------------------------------------------------|-------------------|-----|-----|----|----|---------------------|---|----|----|----|---------------------------------------------------|---|------|-------|-------|-------|
| DPC                                                                                    | Anti-N antibodies |     |     |    |    | Anti-RBD antibodies |   |    |    |    | Virus neutralizing antibodies (NT <sub>50</sub> ) |   |      |       |       |       |
|                                                                                        | 5                 | 7   | 10  | 14 | 21 | 5                   | 7 | 10 | 14 | 21 | 1                                                 | 5 | 7    | 10    | 14    | 21    |
| <i>Principals</i>                                                                      |                   |     |     |    |    |                     |   |    |    |    |                                                   |   |      |       |       |       |
| 026                                                                                    | +                 | +   | +   | +  | +  | -                   | + | +  | +  | +  | 0                                                 | 0 | 1:80 | 1:320 | 1:80  | 1:40  |
| 328                                                                                    | -                 | +   | +   | +  | NA | +                   | + | +  | +  | NA | 0                                                 | 0 | 1:20 | 1:160 | 1:160 | 1:160 |
| <i>Sentinels</i>                                                                       |                   |     |     |    |    |                     |   |    |    |    |                                                   |   |      |       |       |       |
| 272                                                                                    | -                 | -   | -   | +  | +  | -                   | - | -  | -  | +  | 0                                                 | 0 | 0    | 1:160 | 1:160 | 1:160 |
| 903                                                                                    | -                 | +/- | +/- | +  | +  | -                   | - | -  | +  | +  | 0                                                 | 0 | 0    | 1:80  | 1:160 | 1:160 |

NA=not available; N=nucleoprotein; RBD=receptor binding domain of spike protein; +/-=OD close to cut-off

659

660

661 **Figures**

662

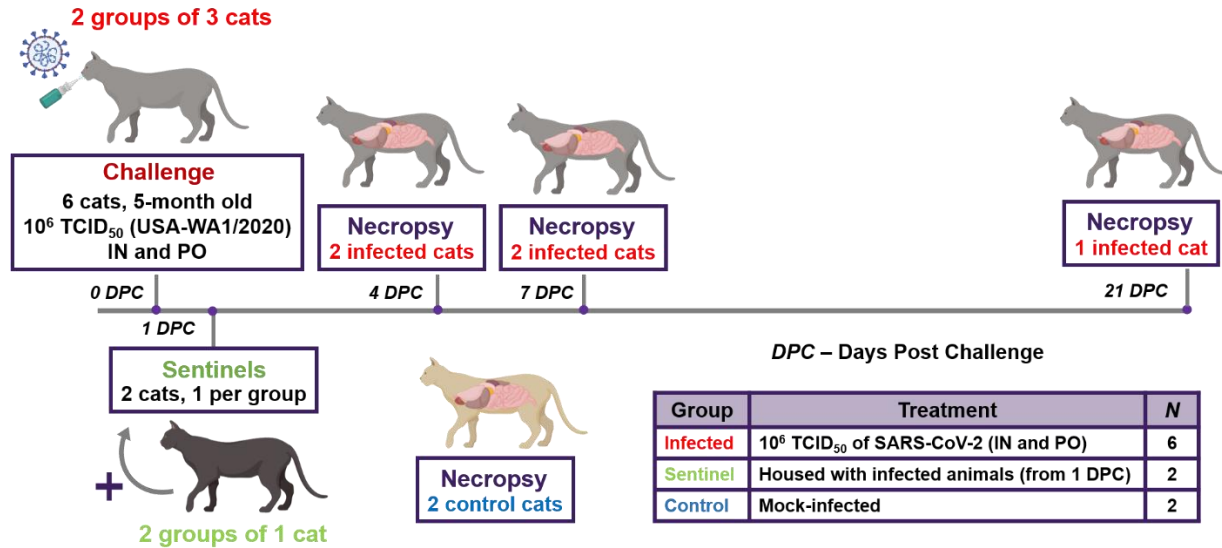

**Figure 1. Study design.** Ten cats were placed into three groups. Group 1 (principal infected animals) consisted of six cats (three cats/cage) and was inoculated via intranasal (IN) and oral (PO) routes simultaneously with a total dose of  $1 \times 10^6$  TCID<sub>50</sub> of SARS-CoV-2 in 2 ml DMEM. The cats in Group 2 (n=2; sentinel contact animals) and Group 3 (n=2; mock control animals) were housed in a separate room. At 1-day post challenge (DPC), the two cats in Group 2 were co-mingled with the principal infected animals in Group 1 (one cat per cage) and served as sentinel contact controls. The remaining two cats in Group 3 remained housed in a separate room and served as mock-infected negative controls. Principal infected animals were euthanized and necropsied at 4 (n=2), 7 (n=2) and 21 (n=1) DPC to evaluate the course of disease. The two negative control animals in Group 3 were euthanized and necropsied at 3 DPC. The remaining three animals from Group 1 (one principal infected animal) and Group 2 (two sentinel contact animals) were maintained for future re-infection studies.

663

664



665

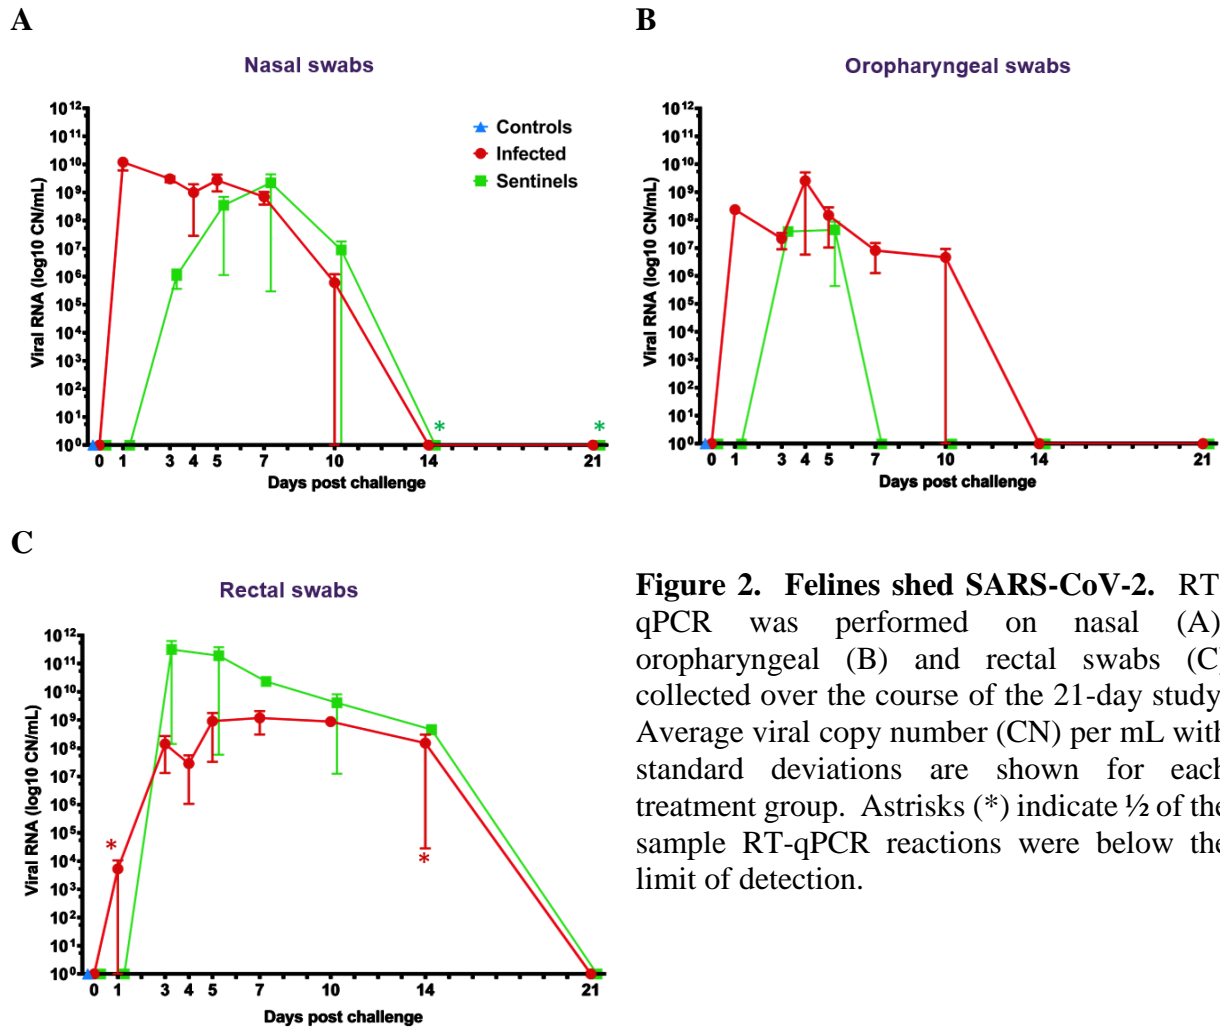

**Figure 2. Felines shed SARS-CoV-2.** RT-qPCR was performed on nasal (A), oropharyngeal (B) and rectal swabs (C) collected over the course of the 21-day study. Average viral copy number (CN) per mL with standard deviations are shown for each treatment group. Astrisks (\*) indicate ½ of the sample RT-qPCR reactions were below the limit of detection.

666

667

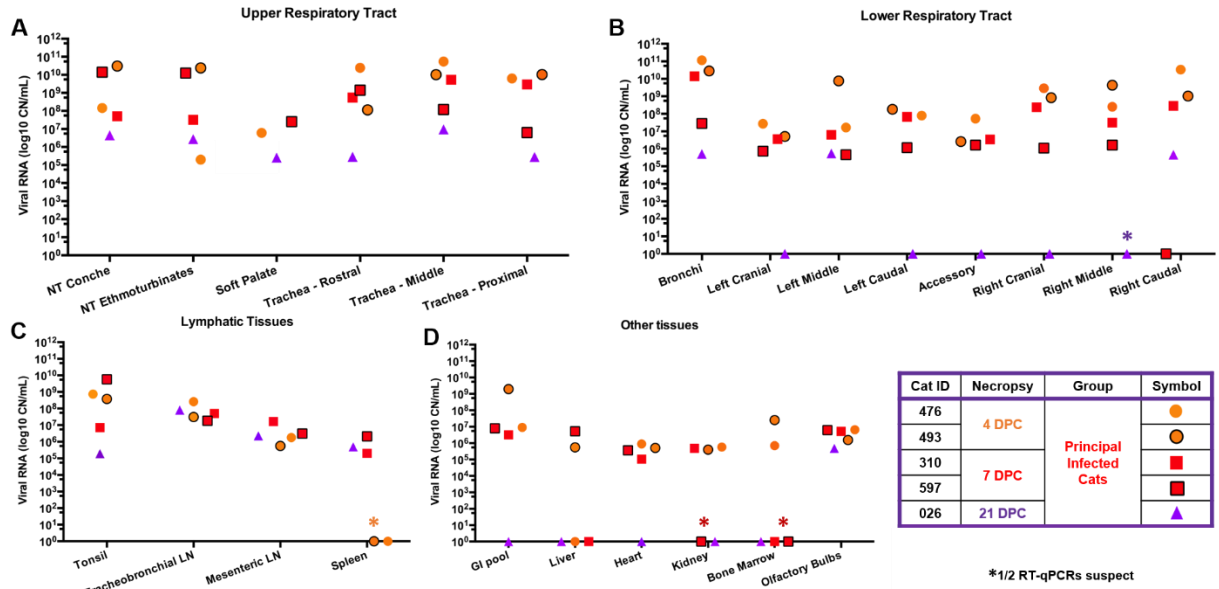

**Figure 3. Viral RNA in tissues.** SARS-CoV-2 copy number (CN) per mg tissues based on N is shown. LN=lymph node; GI=gastrointestinal

668

669

670

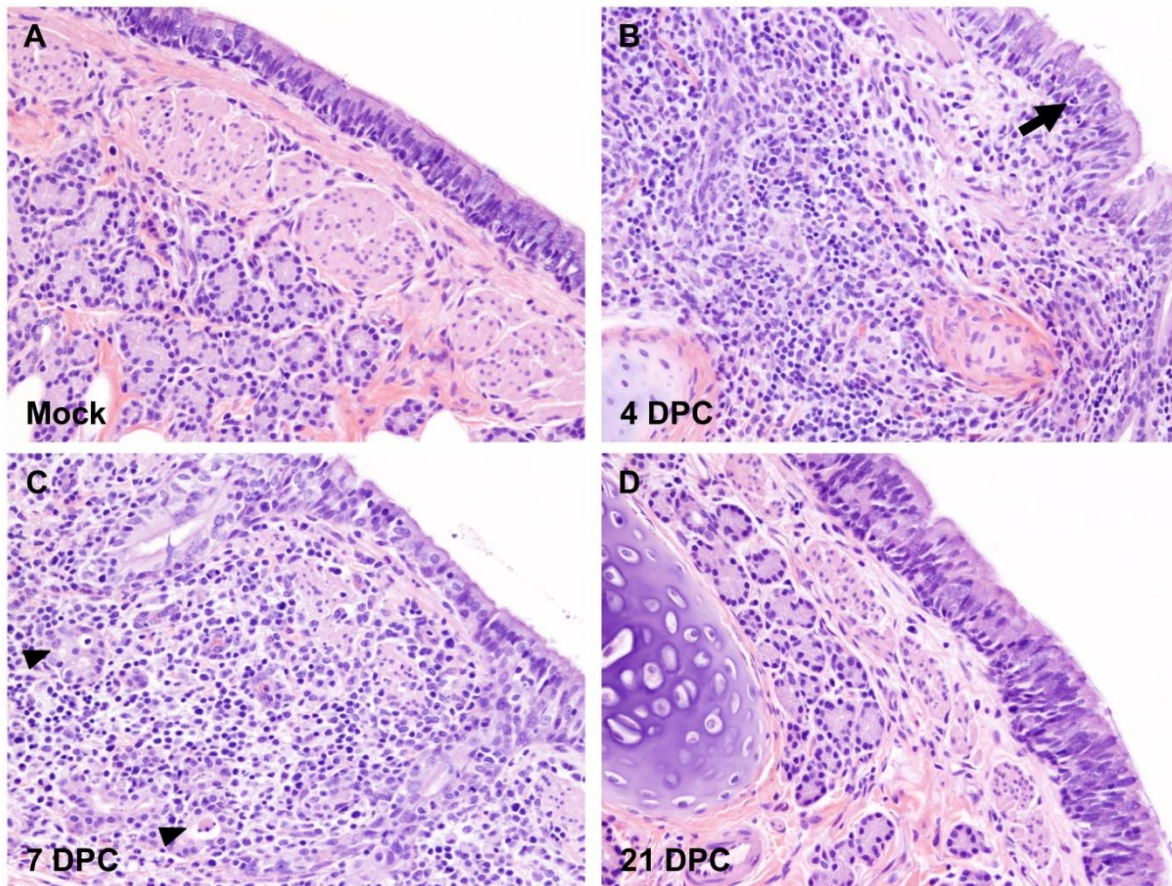

**Figure 4. Histopathology of bronchi.** Histological findings in the main bronchi of mock (A) and SARS-CoV-2 experimentally infected (B-D) cats. Histologic changes and their progression are similar to those observed in the trachea, with multifocal, widespread, mild to moderate lymphocytic and neutrophilic adenitis noted at 4 days post-challenge (DPC; B) and 7 DPC (C). Necrotic debris within distorted submucosal glands are indicated with arrowheads (C), and few transmigrating lymphocytes are indicated with an arrow (B). No histologic changes are noted at 21 DPC (D). H&E. Total magnification: 200X

671



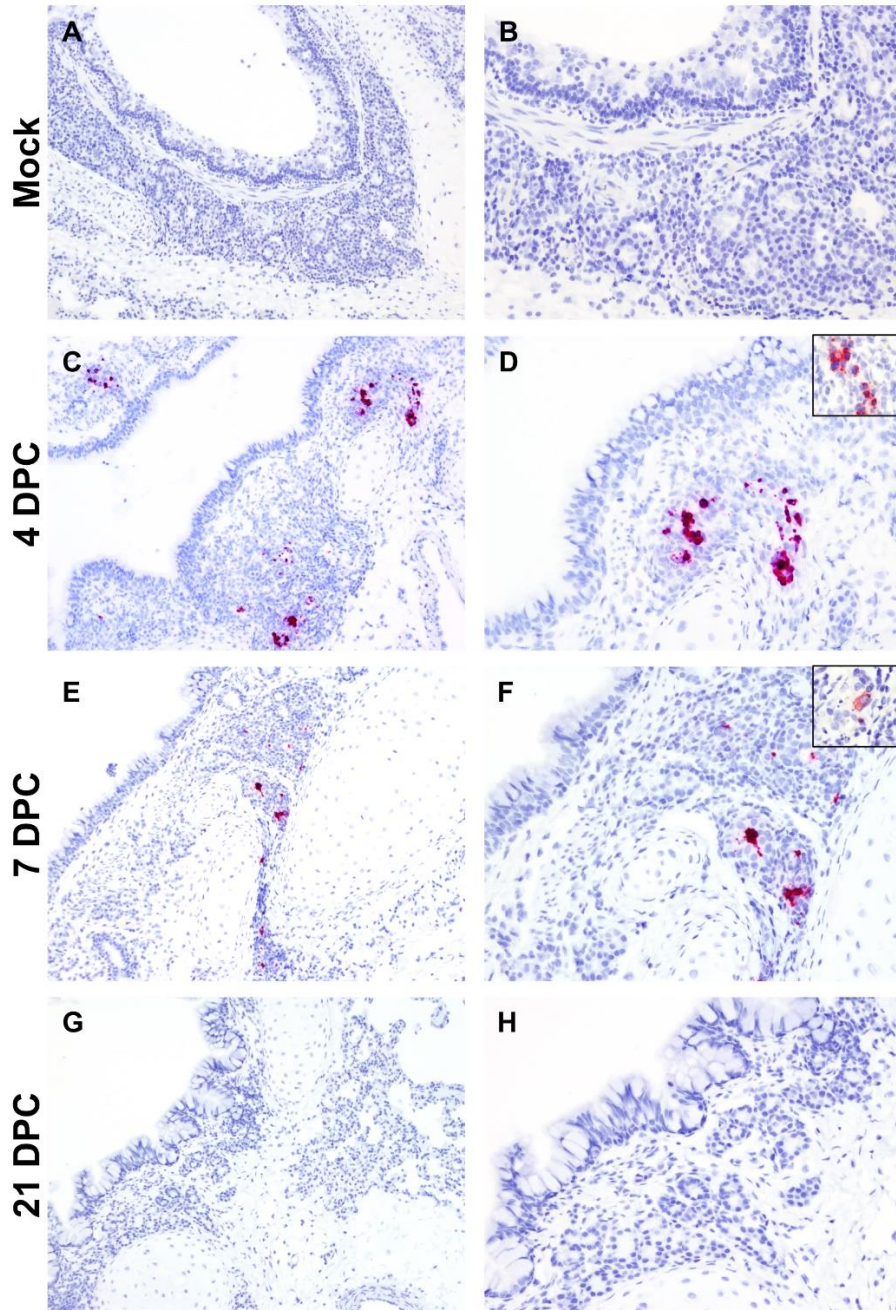

**Figure 5. SARS-CoV-2 RNA and antigen detection in bronchi.** SARS-CoV-2 tropism in bronchi of mock (A and B) experimentally (C-H) infected cats determined by S-specific RNAscope® *in situ* hybridization (Fast Red) and anti-N-specific immunohistochemistry (IHC; Fast Red). The viral tropism is limited to glandular and ductular epithelial cells of multifocal, scattered submucosal glands, as noted in the trachea. Viral RNA is detected within infected cells at 4 days post-challenge (DPC; C and D) and, to a lower degree at 7 DPC (E and F). Few scattered glandular epithelial cells are positive for SARS-CoV-2 N antigen by IHC (D and F, insets). No viral RNA or antigen is detected at 21 DPC (G and H). Total magnification: 100X (A, C, E and G) and 200X (B, D, F, H).
